# Supplementary material for: Seismic Activity of the Manisa Fault Zone in Western Turkey Constrained by Cosmogenic 36Cl Dating
Source: MDPI journal article supplement (doi:10.3390/geosciences11110451), 2021-10-31
Supplement: s1 [file s1]

## **List of code's functions and files**

\\\\\\=====\\\\\\\\

### **\\1/ User interface functions**

FSDT\_Database\_Maker.fig - the description of the Database Maker interface.

FSDT\_Database\_Maker.m - the control code of the Database Maker interface.

FSDT\_Simulator.fig - the description of the Simulator interface.

FSDT\_Simulator.m - the control code of the Simulator interface.

Histogram\_Overview.m - the description and the control code of the Histogram Overview window.

Main\_Result.m - the description and the control code of the Main Result window.

Parameter\_Window.m - the description and the control code of the Resulting Parameter window.

Probability\_Density\_Plot.m - the description and the control code of the Probability Density Plot window.

Scarp\_Visual\_Check.m - the description and the control code of the Visual Check window of the scarp cross-section.

Topo\_Visual\_Check.m - the description and the control code of the Visual Check window of the topographic shielding.

### **\\2/ Calculation functions**

angdist.m - see CRONUS-Earth Al-26/Be-10 exposure age calculator, MATLAB function reference, Version 2: November 2007.

[http://hess.ess.washington.edu/math/docs/al\\_be\\_v2/al\\_be\\_fctn\\_desc/](http://hess.ess.washington.edu/math/docs/al_be_v2/al_be_fctn_desc/)

antatm.m - see CRONUS-Earth Al-26/Be-10 exposure age calculator, MATLAB function reference, Version 2: November 2007.

[http://hess.ess.washington.edu/math/docs/al\\_be\\_v2/al\\_be\\_fctn\\_desc/](http://hess.ess.washington.edu/math/docs/al_be_v2/al_be_fctn_desc/)

BalcoScaling.m - the compilation of functions make\_al\_be\_consts\_v22.m and get\_al\_be\_age.m. See CRONUS-Earth Al-26/Be-10 exposure age calculator, MATLAB function reference, Version 2: November 2007.

[http://hess.ess.washington.edu/math/docs/al\\_be\\_v2/al\\_be\\_fctn\\_desc/](http://hess.ess.washington.edu/math/docs/al_be_v2/al_be_fctn_desc/)

cleanXlsSheets.m - cleans a XLS-file content.

<http://www.mathworks.com/matlabcentral/answers/642-how-do-i-clear-the-contents-of-excel-by-sheet>

cont\_mode.m - finds the modal value of a continuously distributed variable

d2r.m - see CRONUS-Earth Al-26/Be-10 exposure age calculator, MATLAB function reference, Version 2: November 2007.

[http://hess.ess.washington.edu/math/docs/al\\_be\\_v2/al\\_be\\_fctn\\_desc/](http://hess.ess.washington.edu/math/docs/al_be_v2/al_be_fctn_desc/)

DBmaker.m - creates database MAT-file for reconstruction of fault scarp exposure history.

desilets2006sp.m - see CRONUS-Earth Al-26/Be-10 exposure age calculator, MATLAB function reference, Version 2: November 2007.

[http://hess.ess.washington.edu/math/docs/al\\_be\\_v2/al\\_be\\_fctn\\_desc/](http://hess.ess.washington.edu/math/docs/al_be_v2/al_be_fctn_desc/)

dunai2001sp.m - see CRONUS-Earth Al-26/Be-10 exposure age calculator, MATLAB function reference, Version 2: November 2007.

[http://hess.ess.washington.edu/math/docs/al\\_be\\_v2/al\\_be\\_fctn\\_desc/](http://hess.ess.washington.edu/math/docs/al_be_v2/al_be_fctn_desc/)

fit1decay.m - approximates data with one exponential decay function.  
 fun2decay.m - returns value of sum of two exponential decay function  
 fun3decay.m - returns value of sum of three exponential decay function  
 get\_rand.m - generates random value  
 lifton2006sp.m - see CRONUS-Earth Al-26/Be-10 exposure age calculator,  
 MATLAB function reference, Version 2: November 2007.  
[http://hess.ess.washington.edu/math/docs/al\\_be\\_v2/al\\_be\\_fctn\\_desc/](http://hess.ess.washington.edu/math/docs/al_be_v2/al_be_fctn_desc/)  
 MonteCarloScarp.m - generates random rupture histories and collects  
 histories with chi-squared below threshold  
 NCEPatm\_2.m - see CRONUS-Earth Al-26/Be-10 exposure age calculator, MATLAB  
 function reference, Version 2: November 2007.  
[http://hess.ess.washington.edu/math/docs/al\\_be\\_v2/al\\_be\\_fctn\\_desc/](http://hess.ess.washington.edu/math/docs/al_be_v2/al_be_fctn_desc/)  
 PointShield\_mu.m - calculates scaled flux of fast muons at a point of  
 footwall  
 PointShield\_sp.m - calculates shielding factor for high-energy neutrons at  
 a point of footwall  
 PointShield\_sp\_coll.m - calculates shielding factor for high-energy  
 neutrons at a point of colluvium surface  
 PointShield\_sp\_th.m - calculates apparent attenuation length in a footwall  
 below colluvium  
 r2d.m - see CRONUS-Earth Al-26/Be-10 exposure age calculator, MATLAB  
 function reference, Version 2: November 2007.  
[http://hess.ess.washington.edu/math/docs/al\\_be\\_v2/al\\_be\\_fctn\\_desc/](http://hess.ess.washington.edu/math/docs/al_be_v2/al_be_fctn_desc/)  
 round\_from\_zero.m - rounds a number from zero  
 ScarpSimulator.m - calculates accumulated  $^{36}\text{Cl}$  distribution according to a  
 rupture history  
 sec2hhmmss.m - converts time in seconds into HH.MM.SS format  
 stone2000.m - see CRONUS-Earth Al-26/Be-10 exposure age calculator, MATLAB  
 function reference, Version 2: November 2007.  
[http://hess.ess.washington.edu/math/docs/al\\_be\\_v2/al\\_be\\_fctn\\_desc/](http://hess.ess.washington.edu/math/docs/al_be_v2/al_be_fctn_desc/)  
 stone2000Rcsp.m - see CRONUS-Earth Al-26/Be-10 exposure age calculator,  
 MATLAB function reference, Version 2: November 2007.  
[http://hess.ess.washington.edu/math/docs/al\\_be\\_v2/al\\_be\\_fctn\\_desc/](http://hess.ess.washington.edu/math/docs/al_be_v2/al_be_fctn_desc/)  
 ThermEpithermNeutronCoef.m - calculates attenuation lengths and  
 coefficients for thermal and epithermal neutrons  
 TpToTopo.m - converts topographic shielding represented as bars or broken-  
 line into a matrix of digitalised sky hemisphere

### **\3/ Help and data files**

Database\_Maker\_Help.txt - help file of Database Maker  
 NCEP2.mat - see CRONUS-Earth Al-26/Be-10 exposure age calculator, MATLAB  
 function reference, Version 2: November 2007.  
[http://hess.ess.washington.edu/math/docs/al\\_be\\_v2/al\\_be\\_fctn\\_desc/](http://hess.ess.washington.edu/math/docs/al_be_v2/al_be_fctn_desc/)  
 nucl\_data.mat - data file that contains nuclear physical constants  
 PMag\_Mar07.mat - see CRONUS-Earth Al-26/Be-10 exposure age calculator,  
 MATLAB function reference, Version 2: November 2007.  
[http://hess.ess.washington.edu/math/docs/al\\_be\\_v2/al\\_be\\_fctn\\_desc/](http://hess.ess.washington.edu/math/docs/al_be_v2/al_be_fctn_desc/)  
 Simulator\_Help.txt - help file of Simulator
